# Supplementary material
Source: PubMed Central journal article supplement (PMC4696064)

## Supplementary Online Content

Margonis GA, Kim Y, Spolverato G, et al. Association between specific mutations in *KRAS* codon 12 and colorectal liver metastasis. *JAMA Surg*. Published online June 3, 2015. doi:10.1001/jamasurg.2015.0313.

**eFigure.** Overall Survival of Patients With Colorectal Liver Metastasis Undergoing Hepatic Resection, Stratified by *KRAS* Status ( $P = 0.02$ )

This supplementary material has been provided by the authors to give readers additional information about their work.

**eFigure.** Overall Survival of Patients With Colorectal Liver Metastasis Undergoing Hepatic Resection, Stratified by *KRAS* Status ( $P=0.02$ )

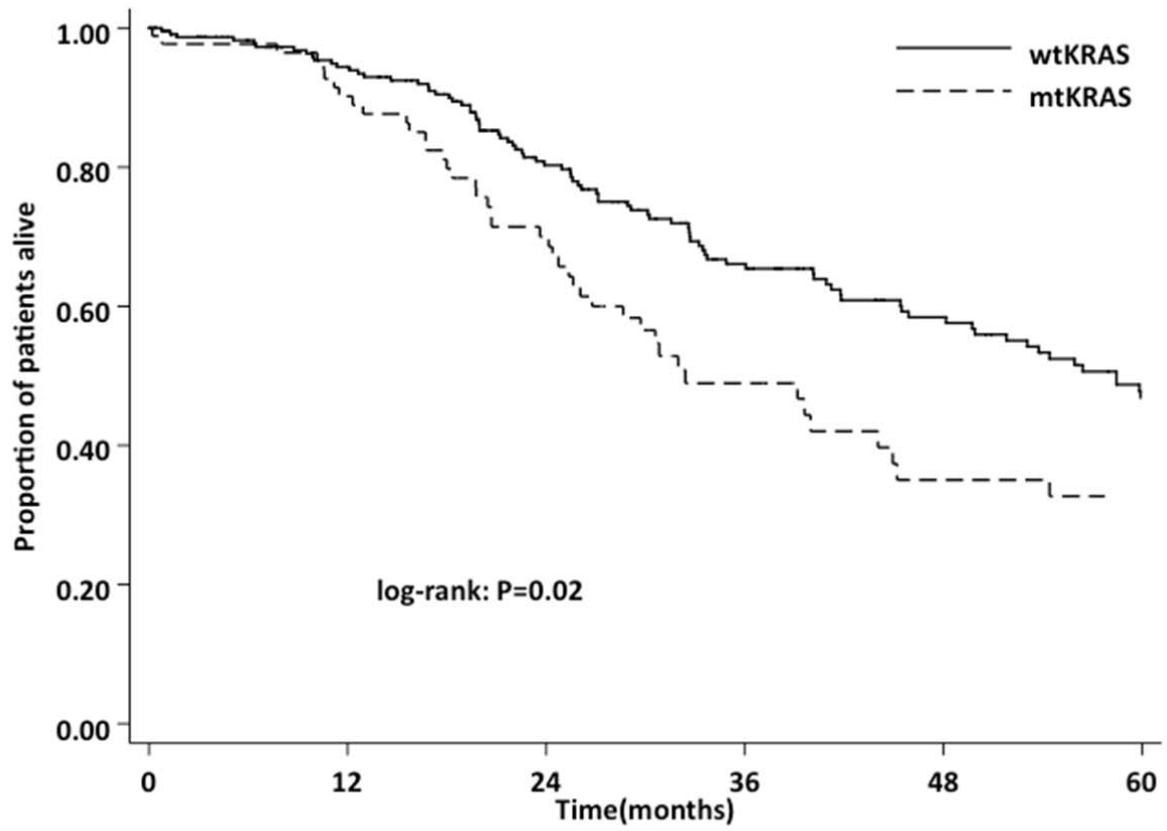

Supplement: NIHMS736312-supplement-Suppl_info.pdf [file NIHMS736312-supplement-Suppl_info.pdf]
